# Supplementary material for: Association of Concave Deformity of the Anterior Scalene on Magnetic Resonance Imaging with Vascular Variant of Neurogenic Thoracic Outlet Syndrome
Source: PubMed Central journal article supplement — Plast Reconstr Surg Glob Open. 2024 Oct 10;12(10):e6248. doi: 10.1097/GOX.0000000000006248 (PMC11466083; doi:10.1097/gox.0000000000006248), 2024-10-10
Supplement: gox-12-e6248-s004.pdf [file gox-12-e6248-s004.pdf]

Madassah Upper Arterial

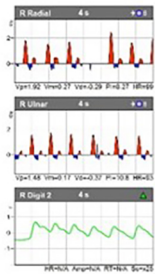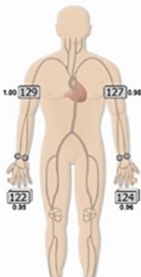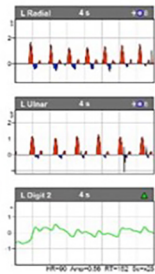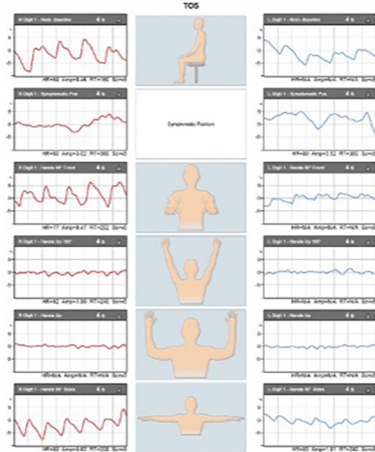

TOS

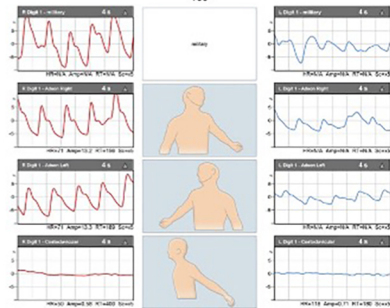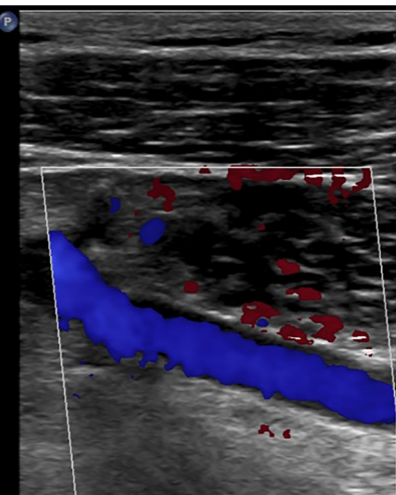

Vasc Venous  
L12-3  
12Hz

2D  
51%  
Dyn R 56  
P Low  
HGen

CF  
49%  
1500Hz  
WF 75Hz  
4.0MHz

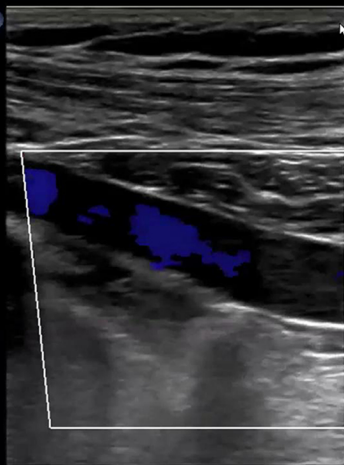

TISO.2 MI 1.2

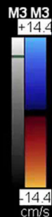

5.0cm bpm

Left Subclavian V TOS TEST
