# Supplementary material for: Association of Concave Deformity of the Anterior Scalene on Magnetic Resonance Imaging with Vascular Variant of Neurogenic Thoracic Outlet Syndrome
Source: PubMed Central journal article supplement — Plast Reconstr Surg Glob Open. 2024 Oct 10;12(10):e6248. doi: 10.1097/GOX.0000000000006248 (PMC11466083; doi:10.1097/gox.0000000000006248), 2024-10-10
Supplement: gox-12-e6248-s005.pdf [file gox-12-e6248-s005.pdf]

**SDC 2. The distribution of preoperative compressive neurogenic associated symptoms.**

|                      | Type A<br>N=20 | Type B1<br>N=7 | Type B2<br>N=5 | Type B3<br>N=12 | P-Value |
|----------------------|----------------|----------------|----------------|-----------------|---------|
| Hand Numbness, n (%) | 14(70%)        | 6(86%)         | 3(60%)         | 6(50%)          | 0.77    |
| Hand Weakness, n (%) | 17(85%)        | 7(100%)        | 5(100%)        | 10(83%)         | 0.45    |
| Arm Weakness, n (%)  | 15(75%)        | 7(100%)        | 5(100%)        | 9(75%)          | 0.56    |
