# Supplementary material for: Association of Concave Deformity of the Anterior Scalene on Magnetic Resonance Imaging with Vascular Variant of Neurogenic Thoracic Outlet Syndrome
Source: PubMed Central journal article supplement — Plast Reconstr Surg Glob Open. 2024 Oct 10;12(10):e6248. doi: 10.1097/GOX.0000000000006248 (PMC11466083; doi:10.1097/gox.0000000000006248), 2024-10-10
Supplement: gox-12-e6248-s006.pdf [file gox-12-e6248-s006.pdf]

---

**SDC 3. The prevalence of venous associated symptoms**

---

|                            | Type A<br>N=20 | Type B1<br>N=7 | Type B2<br>N=5 | Type B3<br>N=12 | P-Value |
|----------------------------|----------------|----------------|----------------|-----------------|---------|
| Visual Disturbances, n (%) | 2(10%)         | 2(29%)         | 1(20%)         | 2(17%)          | 0.28    |
| Hand Swelling, n (%)       | 7(35%)         | 3(43%)         | 2(40%)         | 5(42%)          | 0.99    |
| Hand Heaviness, n (%)      | 13(65%)        | 5(71%)         | 5(100%)        | 3(25%)          | 0.03*   |
