# Supplementary material for: Association of Concave Deformity of the Anterior Scalene on Magnetic Resonance Imaging with Vascular Variant of Neurogenic Thoracic Outlet Syndrome
Source: PubMed Central journal article supplement — Plast Reconstr Surg Glob Open. 2024 Oct 10;12(10):e6248. doi: 10.1097/GOX.0000000000006248 (PMC11466083; doi:10.1097/gox.0000000000006248), 2024-10-10
Supplement: gox-12-e6248-s007.pdf [file gox-12-e6248-s007.pdf]

| <b>SDC 4. The prevalence of arterial associated symptoms</b> |                |                |                |                 |         |
|--------------------------------------------------------------|----------------|----------------|----------------|-----------------|---------|
|                                                              | Type A<br>N=20 | Type B1<br>N=7 | Type B2<br>N=5 | Type B3<br>N=12 | P-Value |
| Cold Feeling Hand, n (%)                                     | 6(30%)         | 5(71%)         | 1(20%)         | 1(8%)           | 0.09    |
| Finger Ulcers, n (%)                                         | 2(10%)         | 2(29%)         | 0(0%)          | 0(0%)           | 0.19    |
